# Supplementary material for: ZnS/ZnO@CNT and ZnS@CNT nanocomposites by gas phase conversion of ZnO@CNT. A systematic study of their photocatalytic properties
Source: Royal Society of Chemistry journal article supplement (doi:10.1039/c7dt00407a), 2017-01-01
Supplement: c7dt00407a1.pdf [file c7dt00407a1.pdf]

## Supporting Information

### **ZnS/ZnO@CNT and ZnS@CNT nanocomposites by gas phase conversion of ZnO@CNT. A systematic study of their photocatalytic properties.**

*Sherif Okeil, Jan Krausmann, Inga Dönges, Sandra Pfleger, Jörg Engstler and Jörg J. Schneider*

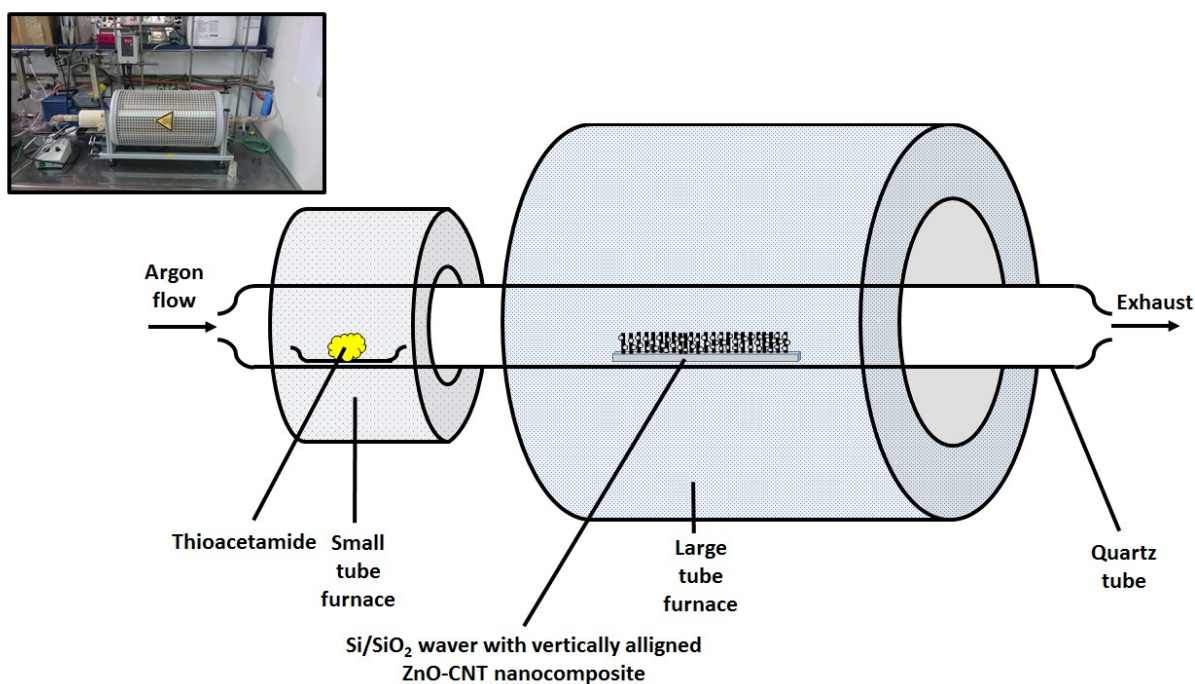

**Figure S1.** Experimental setup for the gas-phase conversion of the ZnO@CNT nanocomposite using thioacetamide as sulfur precursor.

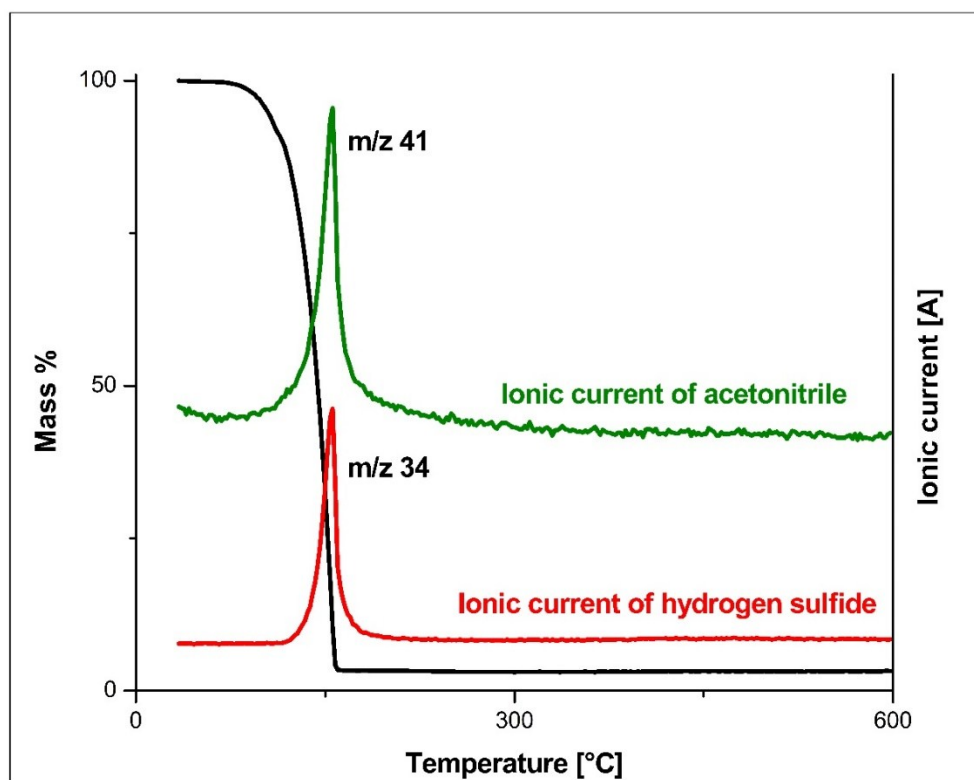

**Figure S2.** TGA-MS of thioacetamide precursor under argon as inert atmosphere showing the ionic current of the decomposition products hydrogen sulfide and acetonitrile.

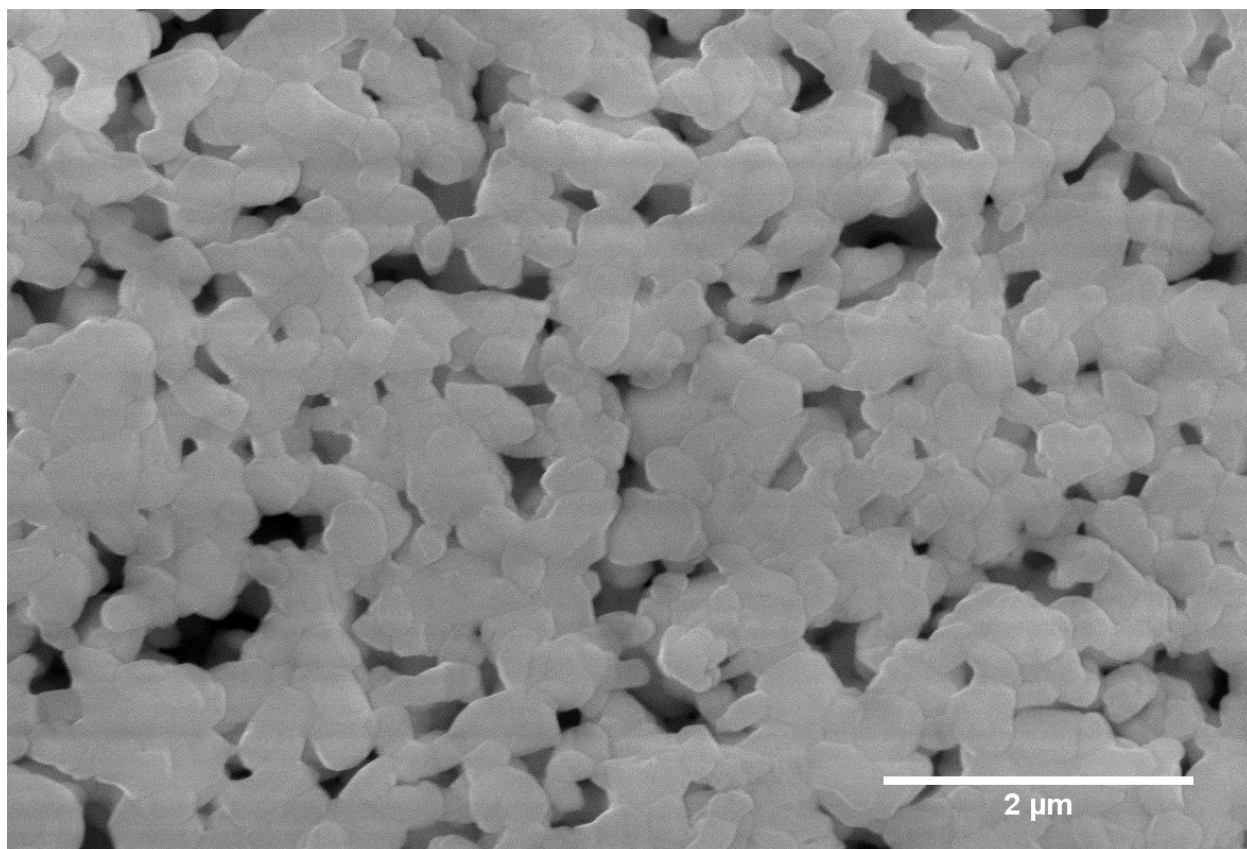

**Figure S3.** SEM of ZnS@CNT nanocomposite formed from ZnO@CNT through reaction with hydrogen sulfide at 950°C for 5min.

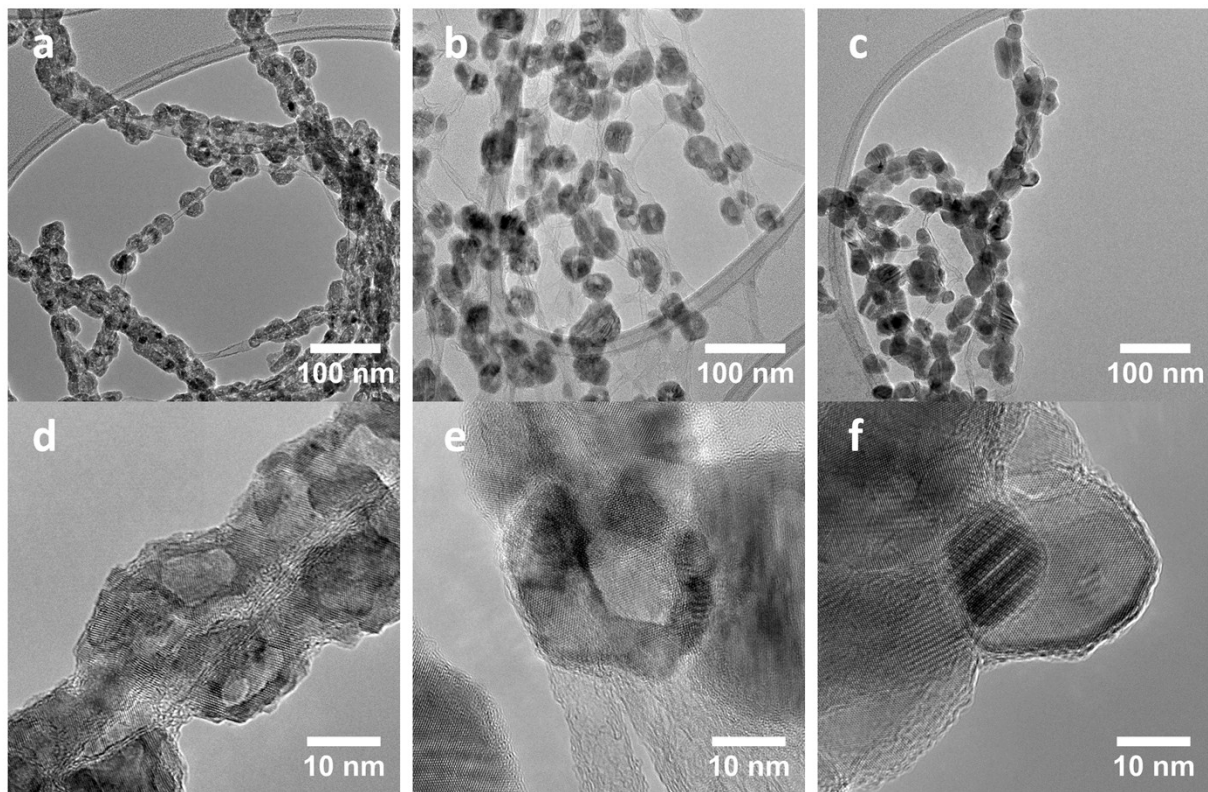

**Figure S4.** TEM images of (a) ZnS/ZnO@CNT nanocomposite synthesized at 350°C for 5 min, (b) ZnS@CNT nanocomposite synthesized at 500°C for 5 min and (c) ZnS@CNT nanocomposite synthesized at 750°C for 5 min. HRTEM of (d) ZnO@ZnS particles tethered onto a CNT showing the void formation in the nanoparticle, (e) ZnS particle (500°C-5 min) tethered onto a CNT showing the void formation in the nanoparticle and (f) ZnS particle (750°C-5 min) tethered onto a CNT showing the formation of solid particles.

**Table S1.** EDX elemental microanalysis of ZnO@CNT nanocomposite after reacting with hydrogen sulfide under different argon flow rates.

| Parameters | Element | Atomic % |          |
|------------|---------|----------|----------|
|            |         | 200 sccm | 600 sccm |
| 350°C/5min | Zn      | 51.95    | 52.63    |
|            | S       | 30.01    | 30.18    |
|            | O       | 18.04    | 17.18    |
| 500°C/5min | Zn      | 48.03    | 49.61    |
|            | S       | 45.29    | 45.82    |
|            | O       | 6.67     | 4.57     |

**Table S2.** EDX elemental microanalysis of ZnO@CNT nanocomposite after reacting with hydrogen sulfide at different temperatures and reaction time.

| Temperature | Element | Atomic % |       |        |
|-------------|---------|----------|-------|--------|
|             |         | 1 min    | 5 min | 30 min |
| 300°C       | Zn      | ---      | 58.04 | 57.84  |
|             | S       | ---      | 10.65 | 11.69  |
|             | O       | ---      | 31.31 | 30.47  |
| 350°C       | Zn      | 51.30    | 52.63 | ---    |
|             | S       | 21.39    | 30.18 | ---    |
|             | O       | 27.31    | 17.18 | ---    |
| 400°C       | Zn      | 50.41    | 50.37 | ---    |
|             | S       | 43.33    | 42.18 | ---    |
|             | O       | 6.26     | 7.45  | ---    |
| 500°C       | Zn      | 49.22    | 51.12 | 47.91  |
|             | S       | 45.16    | 43.29 | 45.54  |
|             | O       | 5.62     | 5.59  | 6.55   |
| 650°C       | Zn      | 48.26    | 49.07 | 57.22  |
|             | S       | 45.60    | 45.43 | 38.69  |
|             | O       | 6.13     | 5.50  | 4.09   |
| 950°C       | Zn      | ---      | 51.53 | 61.45  |
|             | S       | ---      | 48.47 | 38.55  |
|             | O       | ---      | ---   | ---    |

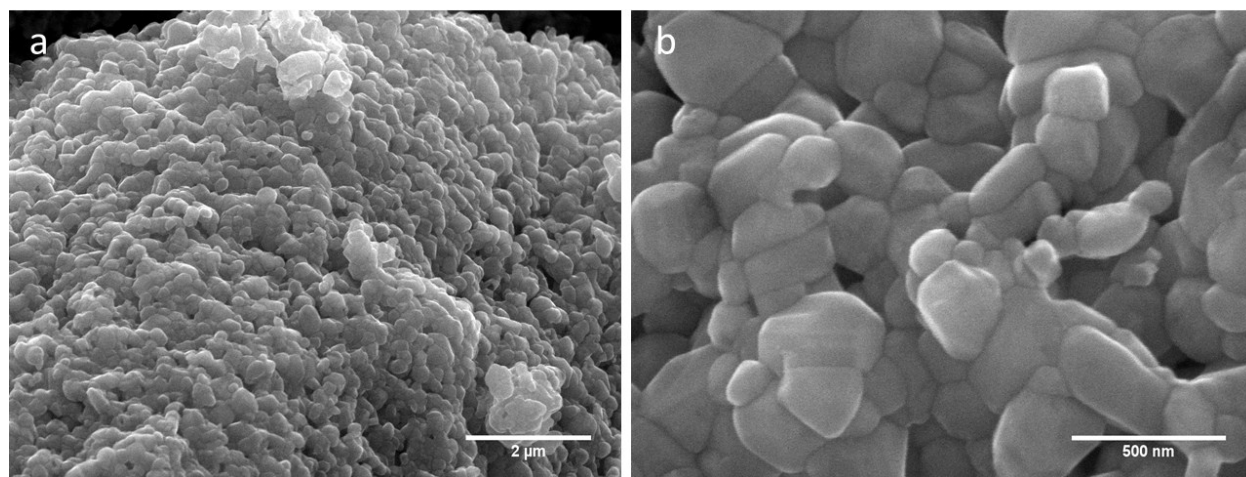

**Figure S5.** SEM of ZnS nanopowder synthesized by conversion of ZnO nanopowder with hydrogen sulfide at 750°C for 1h (a) low magnification, (b) high magnification.

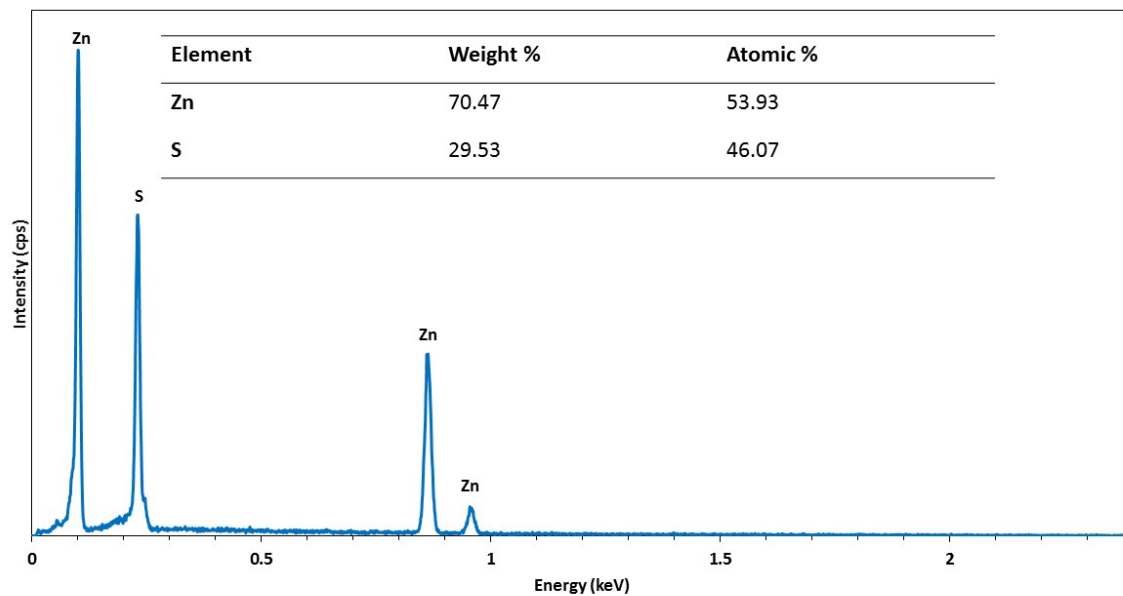

**Figure S6.** EDX elemental microanalysis of the ZnS nanopowder synthesized through conversion of ZnO nanopowder by hydrogen sulfide at 750°C for 1 h.

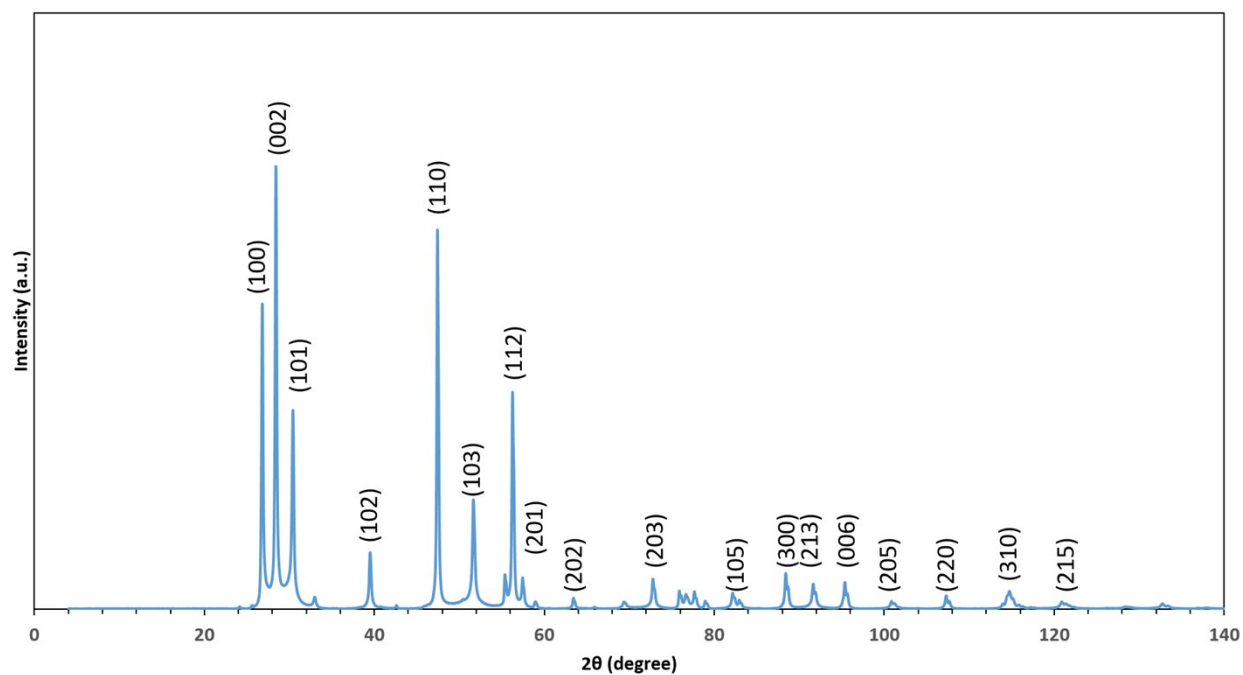

**Figure S7.** XRD diffraction pattern obtained for the ZnS nanopowder synthesized through conversion of ZnO nanopowder by hydrogen sulfide at 750°C for 1 h showing the main reflexes for ZnS wurtzite structure.



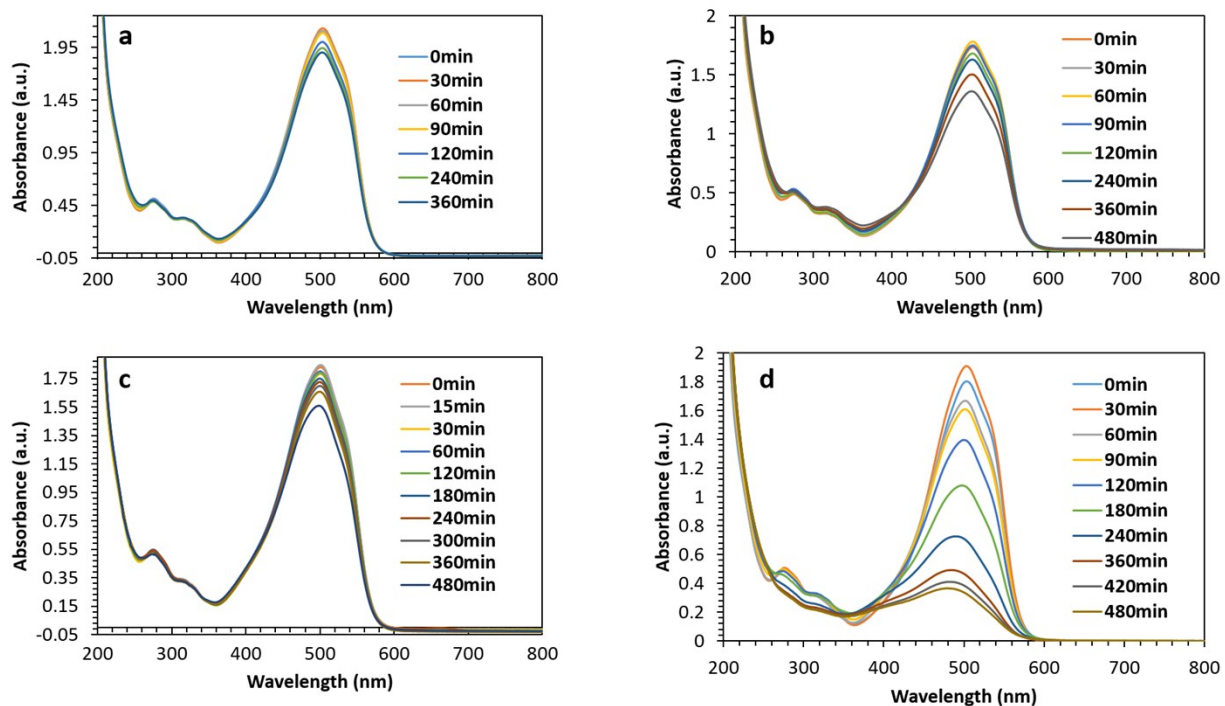

**Figure S8.** UV-VIS absorption spectra of methyl orange during photocatalysis under simulated sunlight (a) without photocatalyst (photolysis), (b) with 1 mg pristine CNT, (c) with 1 mg ZnO@CNT nanocomposite (20 nm particle size) and (d) with 1 mg ZnS@CNT nanocomposite (20 nm particle size) obtained at 750°C for 5 min.

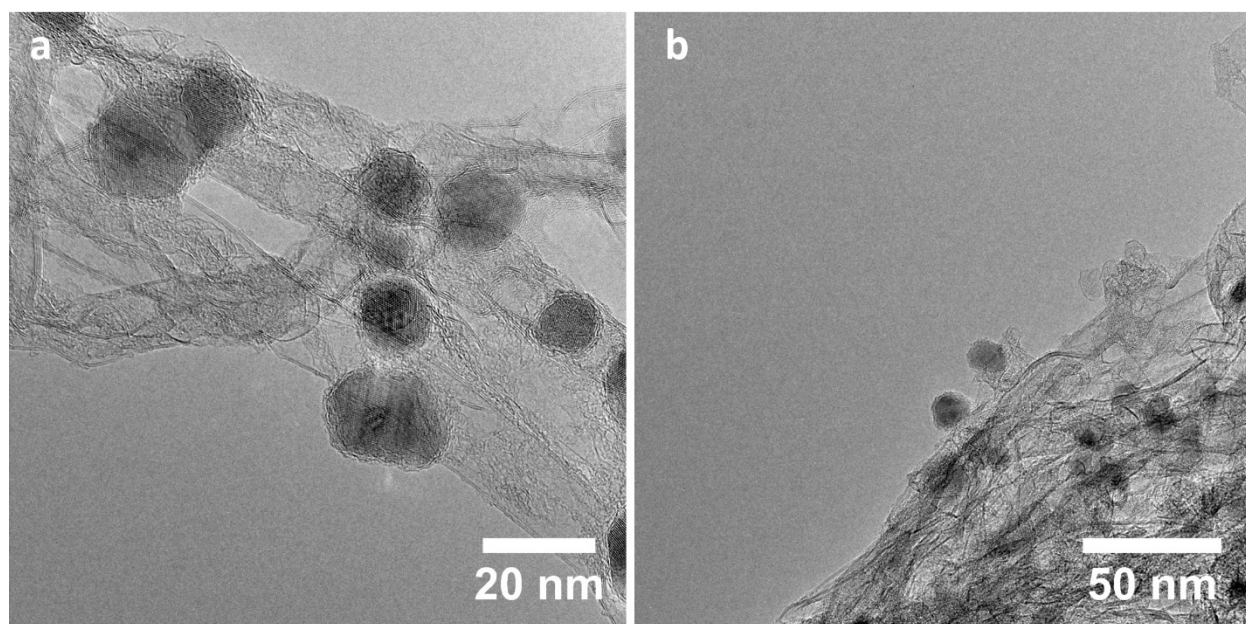

**Figure S9.** TEM image for the ZnS@CNT nanocomposite synthesized at 750°C for 5 min (a) before and (b) after photocatalysis.
